# Supplementary material for: Environmental inequality in the neighborhood networks of urban mobility in US cities
Source: PubMed Central journal article supplement (PMC9169920; doi:10.1073/pnas.2117776119), 2022-04-21
Supplement: pnas.2117776119.sapp.pdf [file pnas.2117776119.sapp.pdf]

# PNAS

[www.pnas.org](http://www.pnas.org)

## **Supplementary Information for**

Environmental inequality in the neighborhood networks of urban mobility in US cities

Noli Brazil

Noli Brazil

Email: [nbrazil@ucdavis.edu](mailto:nbrazil@ucdavis.edu)

### **This PDF file includes:**

Figures S1 to S12

Tables S1 to S8

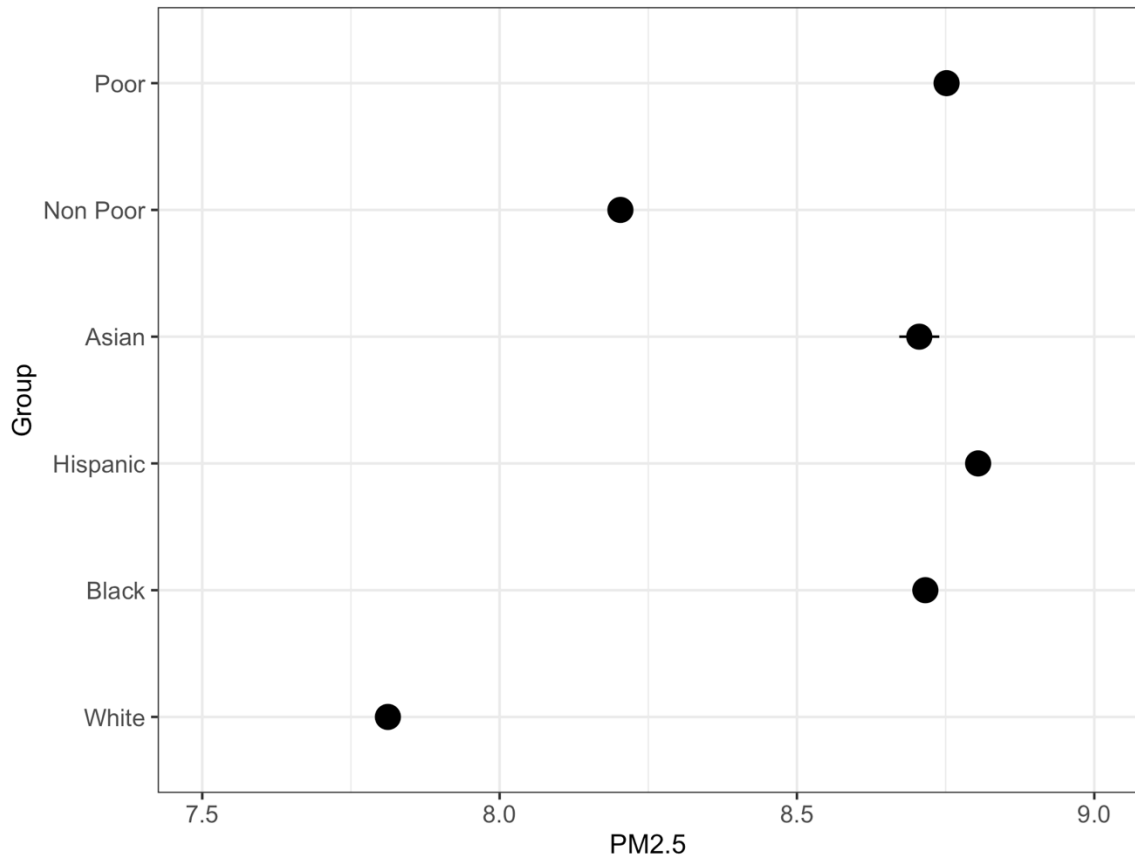

**Fig. S1.** Regression adjusted  $PM_{2.5}$  (with 95% confidence intervals) in the neighborhoods that residents travel to weighted by the number of trips, 60% race/ethnicity and 40% poverty thresholds

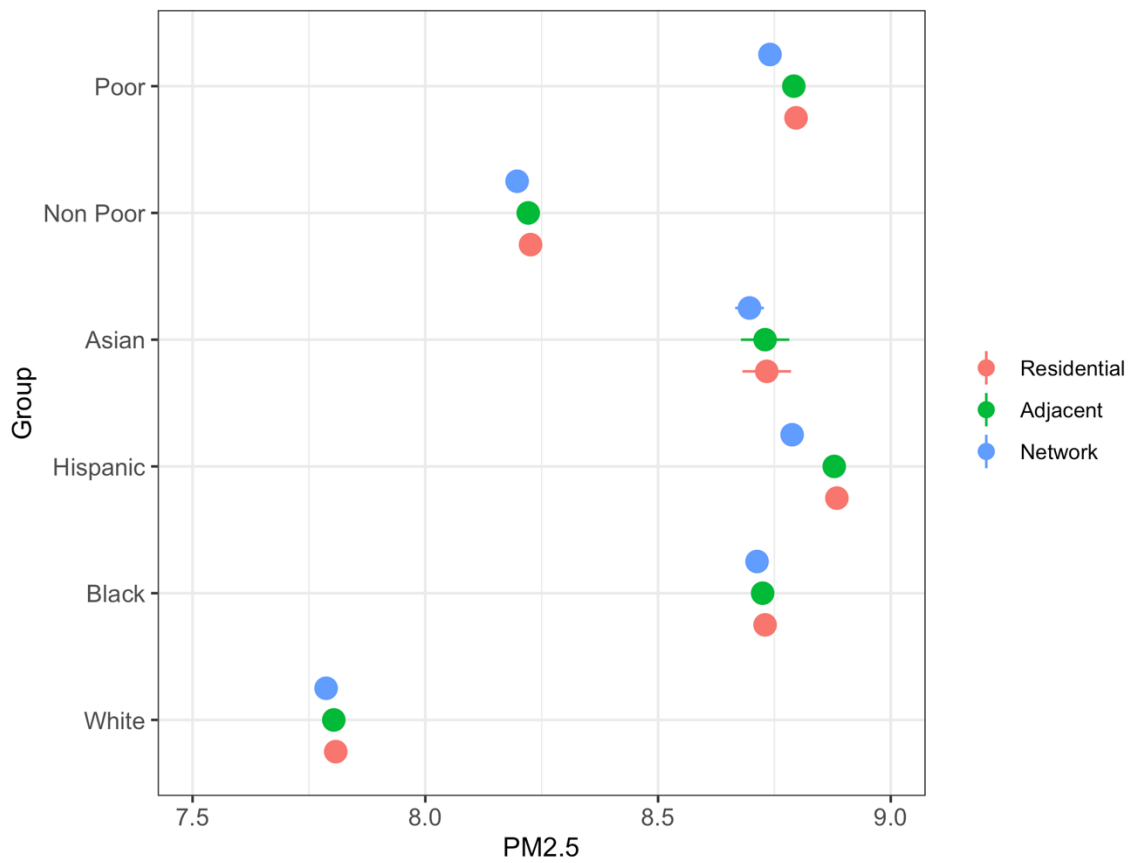

**Fig. S2.** Regression adjusted PM<sub>2.5</sub> (with 95% confidence intervals) in residential neighborhoods (Residential), adjacent neighborhoods (Adjacent) and the non-adjacent neighborhoods that residents travel to (Network) weighted by the number of trips, 60% race/ethnicity and 40% poverty thresholds

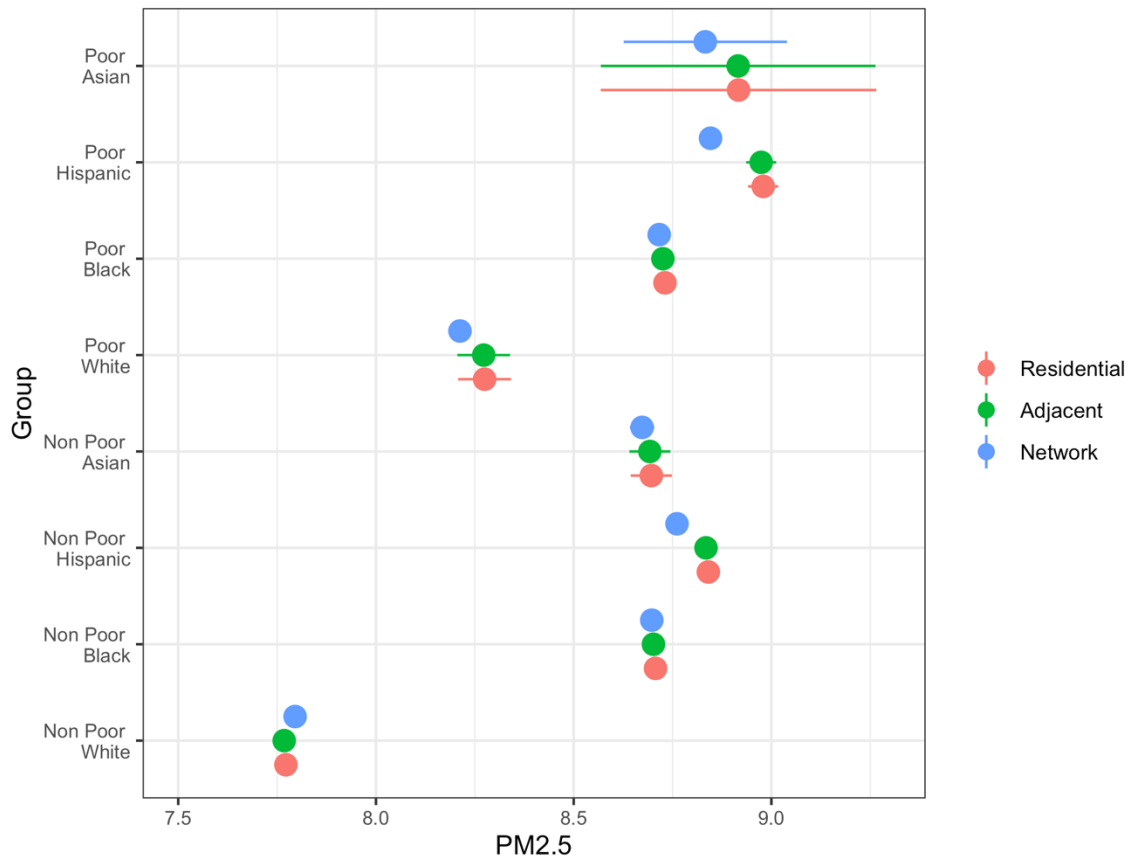

**Fig. S3.** Regression adjusted  $PM_{2.5}$  (with 95% confidence intervals) in residential neighborhoods (Residential), adjacent neighborhoods (Adjacent) and the non-adjacent neighborhoods that residents travel to (Network) weighted by the number of trips by race/ethnicity and poverty status, 60% race/ethnicity and 40% poverty thresholds

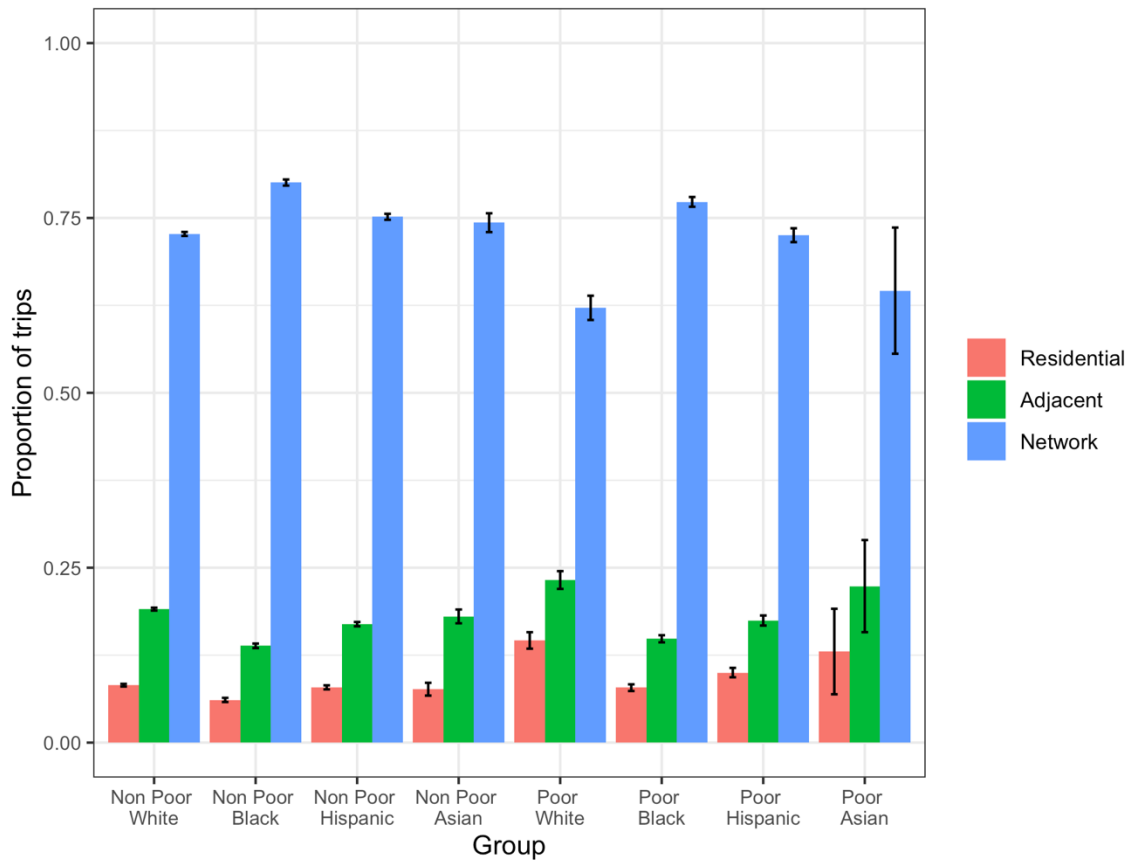

**Fig. S4.** Within-MSA travel patterns by neighborhood racial/ethnic and poverty type, Proportion of trips (with 95% confidence intervals), 60% race/ethnicity and 40% poverty thresholds

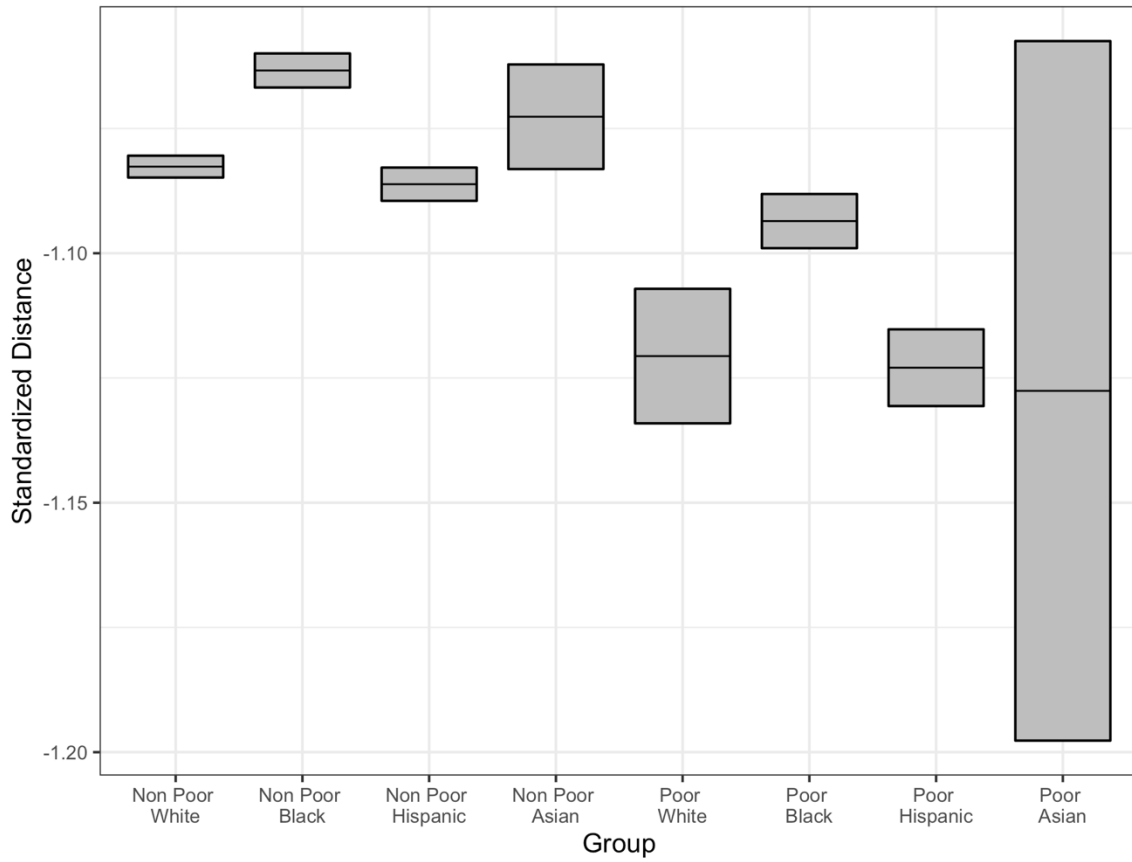

**Fig. S5.** Within-MSA travel patterns by neighborhood racial/ethnic and poverty type, Average distance travelled (with 95% confidence intervals), 60% race/ethnicity and 40% poverty thresholds

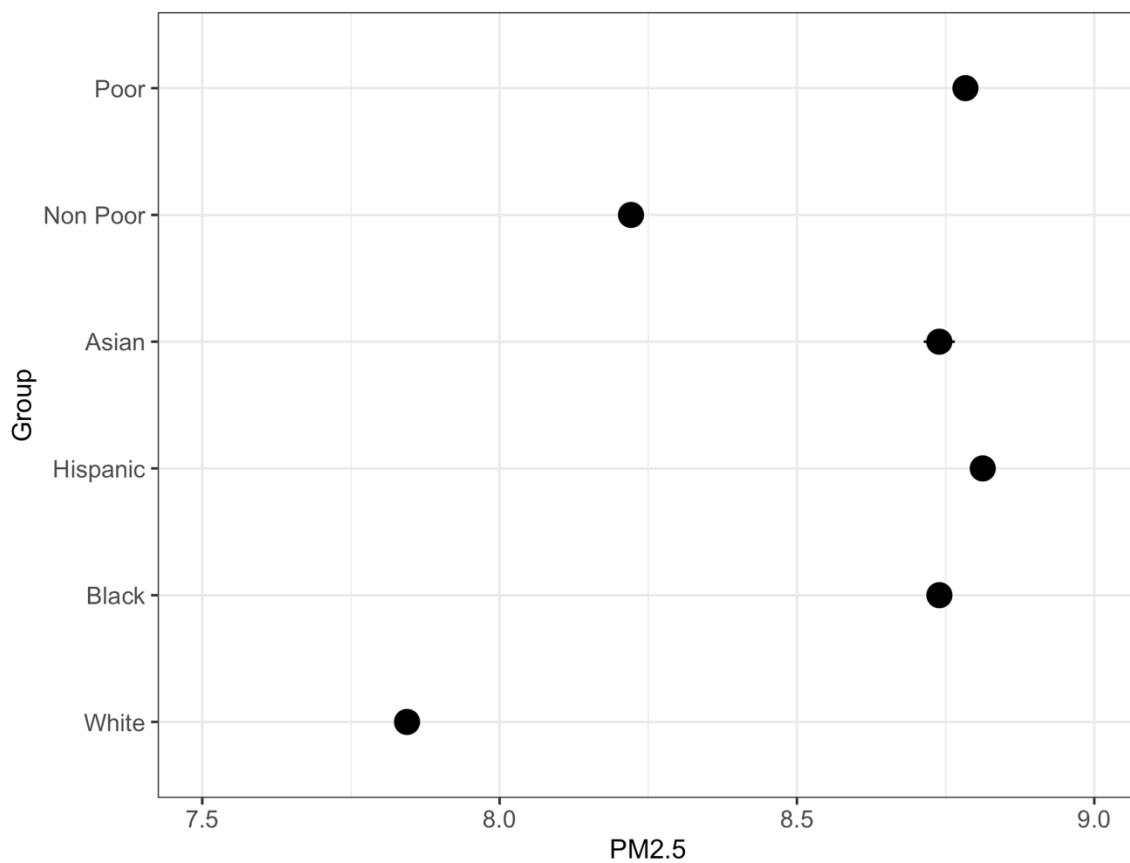

**Fig. S6.** Regression adjusted  $PM_{2.5}$  (with 95% confidence intervals) in the neighborhoods that residents travel to weighted by the number of trips, excludes cities with 75% or more of their neighborhoods considered to be White, Black, Hispanic, Asian, Poor or Nonpoor

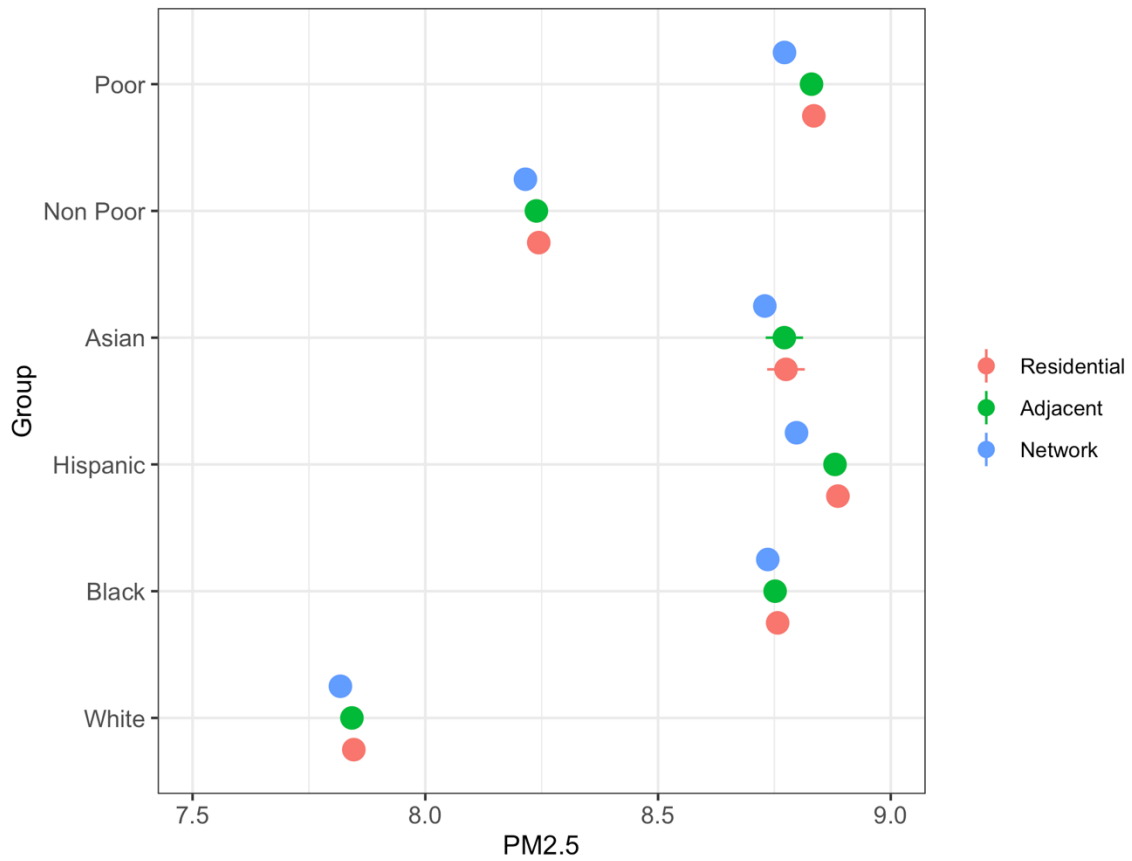

**Fig. S7.** Regression adjusted  $PM_{2.5}$  (with 95% confidence intervals) in residential neighborhoods (Residential), adjacent neighborhoods (Adjacent) and the non-adjacent neighborhoods that residents travel to (Network) weighted by the number of trips, excludes cities with 75% or more of their neighborhoods considered to be White, Black, Hispanic, Asian, Poor or Nonpoor



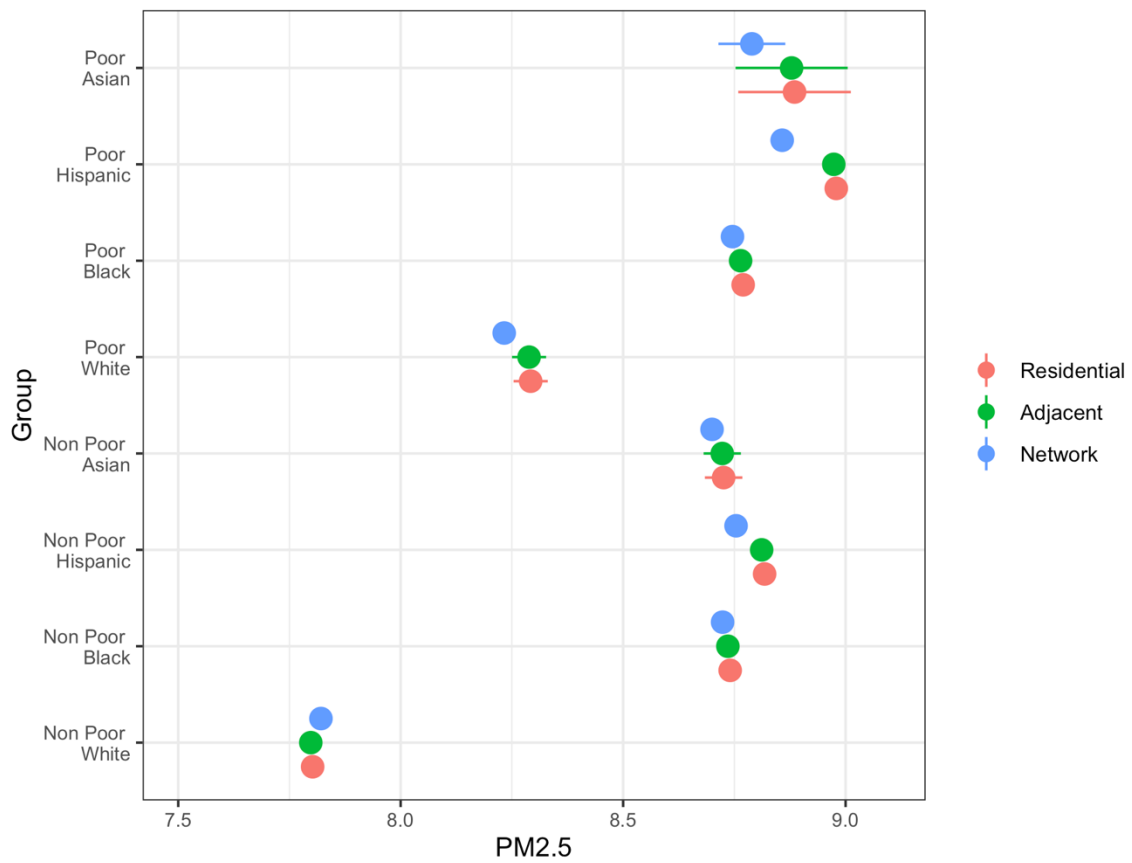

**Fig. S8.** Regression adjusted PM<sub>2.5</sub> (with 95% confidence intervals) in residential neighborhoods (Residential), adjacent neighborhoods (Adjacent) and the non-adjacent neighborhoods that residents travel to (Network) weighted by the number of trips by race/ethnicity and poverty status, excludes cities with 75% or more of their neighborhoods considered to be White, Black, Hispanic, Asian, Poor or Nonpoor

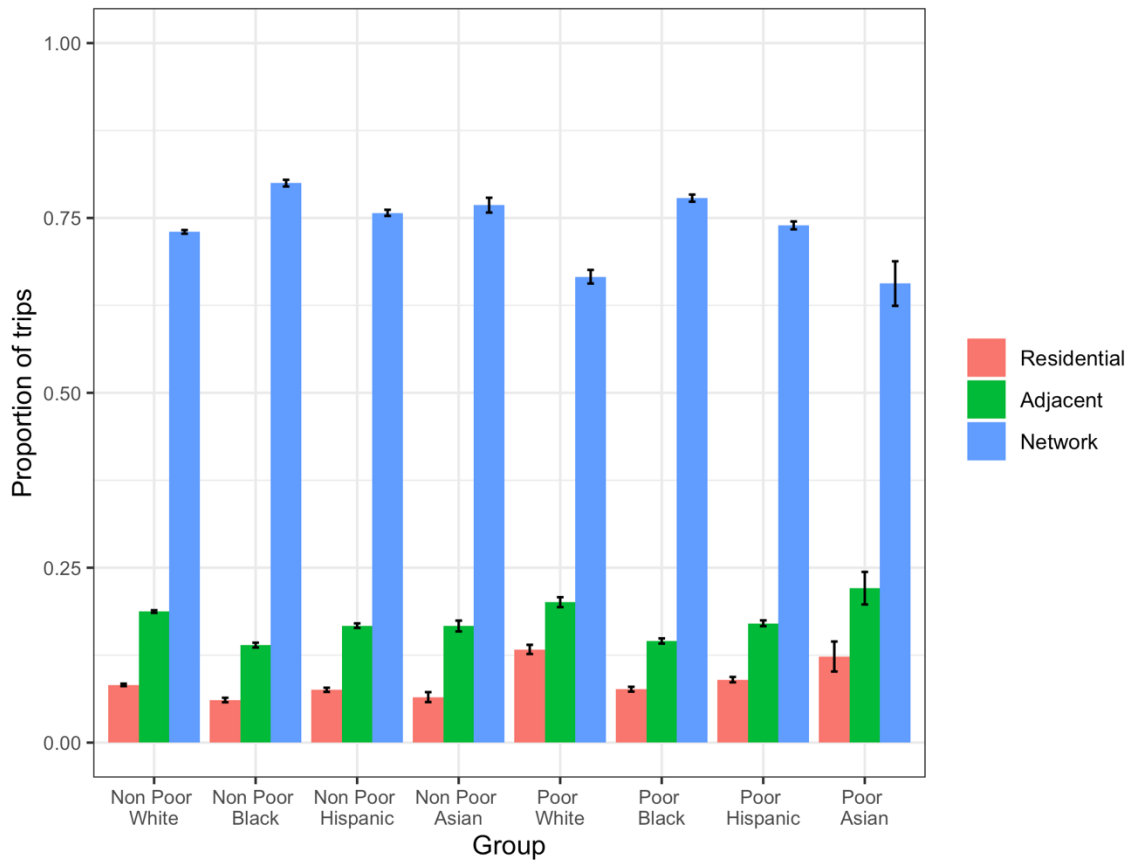

**Fig. S9.** Within-MSA travel patterns by neighborhood racial/ethnic and poverty type, Proportion of trips (with 95% confidence intervals), excludes cities with 75% or more of their neighborhoods considered to be White, Black, Hispanic, Asian, Poor or Nonpoor

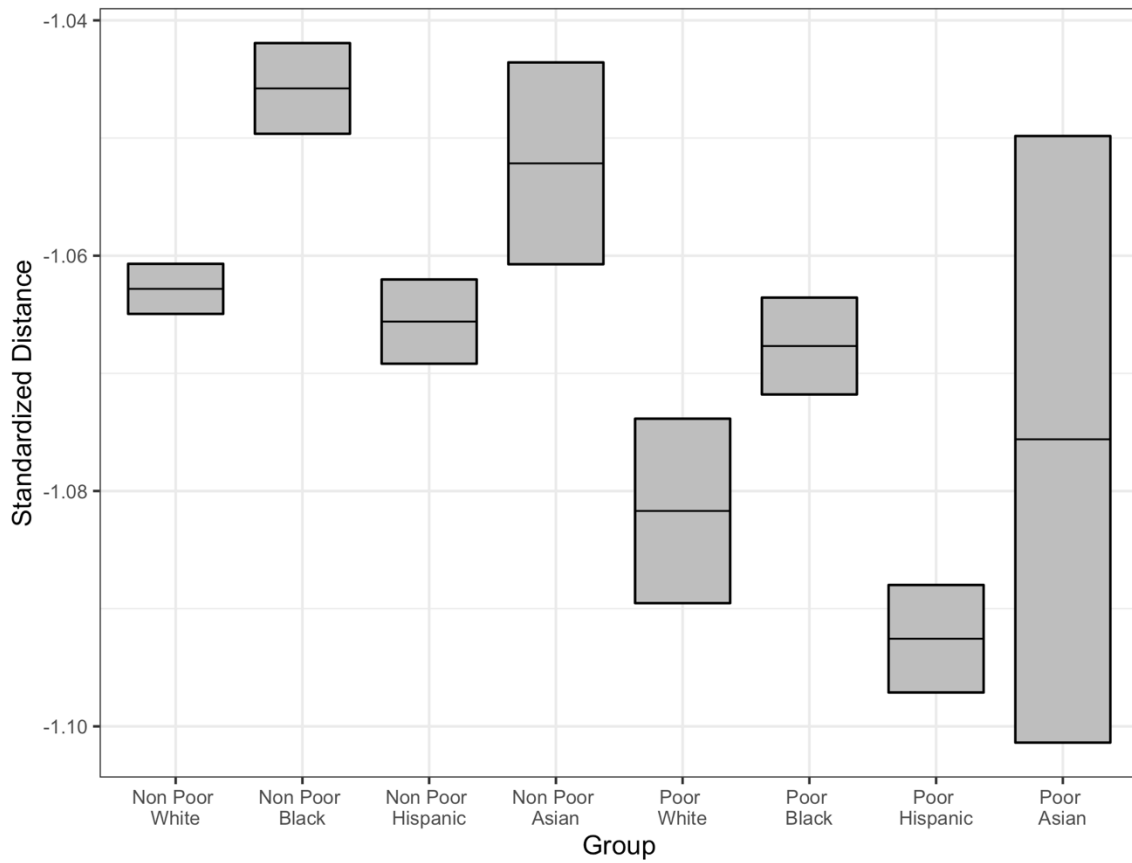

**Fig. S10.** Within-MSA travel patterns by neighborhood racial/ethnic and poverty type, Average distance travelled (with 95% confidence intervals), excludes cities with 75% or more of their neighborhoods considered to be White, Black, Hispanic, Asian, Poor or Nonpoor

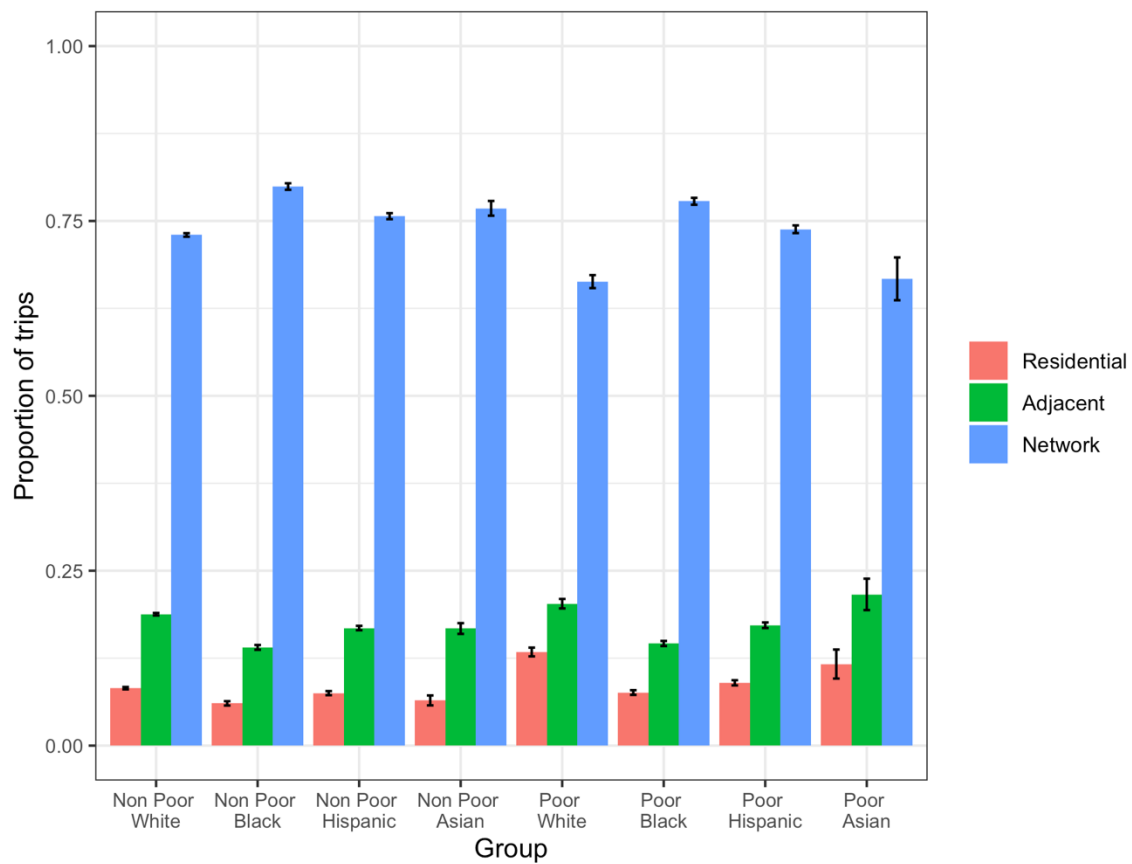

**Fig. S11.** Within-MSA travel patterns by neighborhood racial/ethnic and poverty type, Ordinary Least Squares regression (with 95% confidence intervals).

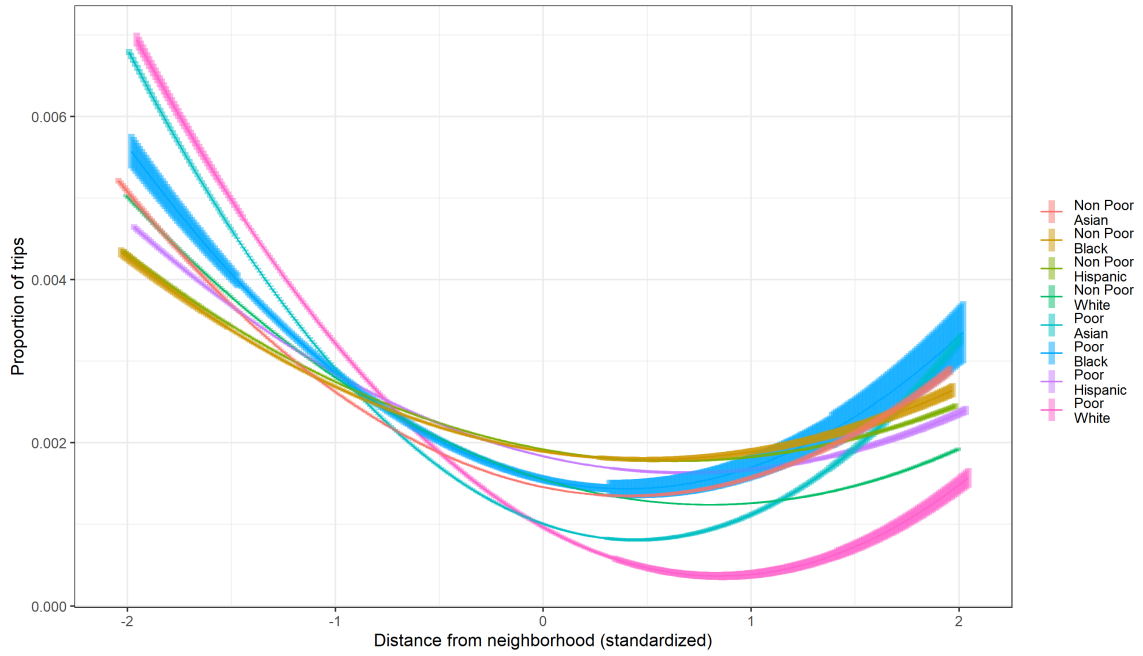

**Fig. S12.** Within-MSA travel patterns by neighborhood racial/ethnic and poverty type, distribution of distance travelled, Ordinary Least Squares regression with quadratic distance (with 95% confidence intervals).

**Table S1.** Descriptive statistics (N = 14,222)

| <b>Variable</b>                                 | <b>Mean</b> | <b>SD</b> | <b>Min</b> | <b>Max</b> |
|-------------------------------------------------|-------------|-----------|------------|------------|
| <i>Race/ethnic neighborhood type</i>            |             |           |            |            |
| Asian                                           | 0.02        | 0.14      | 0.00       | 1.00       |
| Black                                           | 0.19        | 0.40      | 0.00       | 1.00       |
| Hispanic                                        | 0.19        | 0.39      | 0.00       | 1.00       |
| White                                           | 0.38        | 0.48      | 0.00       | 1.00       |
| <i>Poverty neighborhood type</i>                |             |           |            |            |
| Poor                                            | 0.23        | 0.42      | 0.00       | 1.00       |
| <i>Race/ethnic by poverty neighborhood type</i> |             |           |            |            |
| <i>Nonpoor</i>                                  |             |           |            |            |
| Asian                                           | 0.02        | 0.13      | 0.00       | 1.00       |
| Black                                           | 0.10        | 0.30      | 0.00       | 1.00       |
| Hispanic                                        | 0.13        | 0.33      | 0.00       | 1.00       |
| White                                           | 0.36        | 0.48      | 0.00       | 1.00       |
| <i>Poor</i>                                     |             |           |            |            |
| Asian                                           | 0.00        | 0.04      | 0.00       | 1.00       |
| Black                                           | 0.10        | 0.29      | 0.00       | 1.00       |
| Hispanic                                        | 0.07        | 0.25      | 0.00       | 1.00       |
| White                                           | 0.02        | 0.14      | 0.00       | 1.00       |
| Total population                                | 4,100       | 2,098     | 3          | 32,326     |
| Total trips                                     | 59,749      | 42,100    | 16         | 1,003,248  |
| Distance travelled (standardized)               | -1.12       | 0.18      | -1.60      | -0.08      |
| <i>Proportion of trips</i>                      |             |           |            |            |
| Residential                                     | 0.08        | 0.06      | 0.00       | 0.56       |
| Adjacent                                        | 0.16        | 0.07      | 0.00       | 0.61       |
| Neighborhood network (non-adjacent)             | 0.77        | 0.09      | 0.24       | 1.00       |
| <i>PM25</i>                                     |             |           |            |            |
| Residential                                     | 8.89        | 1.36      | 4.21       | 13.54      |
| Adjacent                                        | 8.88        | 1.35      | 4.20       | 13.51      |
| Neighborhood network (all)                      | 8.87        | 1.32      | 5.34       | 13.03      |
| Neighborhood network (non-adjacent)             | 8.87        | 1.31      | 5.37       | 12.97      |

**Table S2.** List of cities and their Metropolitan Statistical Areas (N = 88)

| <b>City</b>                | <b>Metropolitan Statistical Areas</b>      |
|----------------------------|--------------------------------------------|
| Albuquerque, New Mexico    | Albuquerque, NM                            |
| Anaheim, California        | Los Angeles-Long Beach-Anaheim, CA         |
| Arlington, Texas           | Dallas-Fort Worth-Arlington, TX            |
| Atlanta, Georgia           | Atlanta-Sandy Springs-Roswell, GA          |
| Aurora, Colorado           | Denver-Aurora-Lakewood, CO                 |
| Austin, Texas              | Austin-Round Rock, TX                      |
| Bakersfield, California    | Bakersfield, CA                            |
| Baltimore, Maryland        | Baltimore-Columbia-Towson, MD              |
| Baton Rouge, Louisiana     | Baton Rouge, LA                            |
| Boston, Massachusetts      | Boston-Cambridge-Newton, MA-NH             |
| Buffalo, New York          | Buffalo-Cheektowaga-Niagara Falls, NY      |
| Chandler, Arizona          | Phoenix-Mesa-Scottsdale, AZ                |
| Charlotte, North Carolina  | Charlotte-Concord-Gastonia, NC-SC          |
| Chesapeake, Virginia       | Virginia Beach-Norfolk-Newport News, VA-NC |
| Chicago, Illinois          | Chicago-Naperville-Elgin, IL-IN-WI         |
| Chula Vista, California    | San Diego-Carlsbad, CA                     |
| Cincinnati, Ohio           | Cincinnati, OH-KY-IN                       |
| Cleveland, Ohio            | Cleveland-Elyria, OH                       |
| Colorado Springs, Colorado | Colorado Springs, CO                       |
| Columbus, Ohio             | Columbus, OH                               |
| Corpus Christi, Texas      | Corpus Christi, TX                         |
| Dallas, Texas              | Dallas-Fort Worth-Arlington, TX            |
| Denver, Colorado           | Denver-Aurora-Lakewood, CO                 |
| Des Moines, Iowa           | Des Moines-West Des Moines, IA             |

|                                 |                                                 |
|---------------------------------|-------------------------------------------------|
| Detroit, Michigan               | Detroit-Warren-Dearborn, MI                     |
| Durham, North Carolina          | Durham-Chapel Hill, NC                          |
| Fort Wayne, Indiana             | Fort Wayne, IN                                  |
| Fort Worth, Texas               | Dallas-Fort Worth-Arlington, TX                 |
| Fremont, California             | San Francisco-Oakland-Hayward, CA               |
| Fresno, California              | Fresno, CA                                      |
| Garland, Texas                  | Dallas-Fort Worth-Arlington, TX                 |
| Glendale, Arizona               | Phoenix-Mesa-Scottsdale, AZ                     |
| Greensboro, North Carolina      | Greensboro-High Point, NC                       |
| Houston, Texas                  | Houston-The Woodlands-Sugar Land, TX            |
| Indianapolis (balance), Indiana | Indianapolis-Carmel-Anderson, IN                |
| Irvine, California              | Los Angeles-Long Beach-Anaheim, CA              |
| Irving, Texas                   | Dallas-Fort Worth-Arlington, TX                 |
| Jacksonville, Florida           | Jacksonville, FL                                |
| Jersey, New Jersey              | New York-Newark-Jersey City, NY-NJ-PA           |
| Kansas, Missouri                | Kansas City, MO-KS                              |
| Las Vegas, Nevada               | Las Vegas-Henderson-Paradise, NV                |
| Long Beach, California          | Los Angeles-Long Beach-Anaheim, CA              |
| Los Angeles, California         | Los Angeles-Long Beach-Anaheim, CA              |
| Louisville, Kentucky            | Louisville/Jefferson County, KY-IN              |
| Lubbock, Texas                  | Lubbock, TX                                     |
| Memphis, Tennessee              | Memphis, TN-MS-AR                               |
| Mesa, Arizona                   | Phoenix-Mesa-Scottsdale, AZ                     |
| Miami, Florida                  | Miami-Fort Lauderdale-West Palm Beach, FL       |
| Milwaukee, Wisconsin            | Milwaukee-Waukesha-West Allis, WI               |
| Minneapolis, Minnesota          | Minneapolis-St. Paul-Bloomington, MN-WI         |
| Nashville, Tennessee            | Nashville-Davidson--Murfreeseboro--Franklin, TN |



|                            |                                             |
|----------------------------|---------------------------------------------|
| New Orleans, Louisiana     | New Orleans-Metairie, LA                    |
| New York, New York         | New York-Newark-Jersey City, NY-NJ-PA       |
| Newark, New Jersey         | New York-Newark-Jersey City, NY-NJ-PA       |
| Norfolk, Virginia          | Virginia Beach-Norfolk-Newport News, VA-NC  |
| North Las Vegas, Nevada    | Las Vegas-Henderson-Paradise, NV            |
| Oakland, California        | San Francisco-Oakland-Hayward, CA           |
| Oklahoma, Oklahoma         | Oklahoma City, OK                           |
| Omaha, Nebraska            | Omaha-Council Bluffs, NE-IA                 |
| Orlando, Florida           | Orlando-Kissimmee-Sanford, FL               |
| Philadelphia, Pennsylvania | Philadelphia-Camden-Wilmington, PA-NJ-DE-MD |
| Phoenix, Arizona           | Phoenix-Mesa-Scottsdale, AZ                 |
| Pittsburgh, Pennsylvania   | Pittsburgh, PA                              |
| Plano, Texas               | Dallas-Fort Worth-Arlington, TX             |
| Raleigh, North Carolina    | Raleigh, NC                                 |
| Reno, Nevada               | Reno, NV                                    |
| Richmond, Virginia         | Richmond, VA                                |
| Riverside, California      | Riverside-San Bernardino-Ontario, CA        |
| Sacramento, California     | Sacramento--Roseville--Arden-Arcade, CA     |
| San Antonio, Texas         | San Antonio-New Braunfels, TX               |
| San Bernardino, California | Riverside-San Bernardino-Ontario, CA        |
| San Diego, California      | San Diego-Carlsbad, CA                      |
| San Francisco, California  | San Francisco-Oakland-Hayward, CA           |
| San Jose, California       | San Jose-Sunnyvale-Santa Clara, CA          |
| Santa Ana, California      | Los Angeles-Long Beach-Anaheim, CA          |
| Seattle, Washington        | Seattle-Tacoma-Bellevue, WA                 |
| St. Louis, Missouri        | St. Louis, MO-IL                            |
| St. Paul, Minnesota        | Minneapolis-St. Paul-Bloomington, MN-WI     |

|                                  |                                              |
|----------------------------------|----------------------------------------------|
| St. Petersburg, Florida          | Tampa-St. Petersburg-Clearwater, FL          |
| Stockton, California             | Stockton-Lodi, CA                            |
| Tampa, Florida                   | Tampa-St. Petersburg-Clearwater, FL          |
| Toledo, Ohio                     | Toledo, OH                                   |
| Tucson, Arizona                  | Tucson, AZ                                   |
| Tulsa, Oklahoma                  | Tulsa, OK                                    |
| Virginia Beach, Virginia         | Virginia Beach-Norfolk-Newport News, VA-NC   |
| Washington, District of Columbia | Washington-Arlington-Alexandria, DC-VA-MD-WV |
| Wichita, Kansas                  | Wichita, KS                                  |
| Winston-Salem, North Carolina    | Winston-Salem, NC                            |

---

**Table S3.** Descriptive statistics by city

| City                       | White |      |      | Black |      |      | Hispanic |      |      | Asian |      |      | Poor |      |      |
|----------------------------|-------|------|------|-------|------|------|----------|------|------|-------|------|------|------|------|------|
|                            | 25th  | 75th | Mean | 25th  | 75th | Mean | 25th     | 75th | Mean | 25th  | 75th | Mean | 25th | 75th | Mean |
| Albuquerque, New Mexico    | 0.00  | 1.00 | 0.35 | 0.00  | 0.00 | 0.00 | 0.00     | 1.00 | 0.33 | 0.00  | 0.00 | 0.00 | 0.00 | 0.00 | 0.14 |
| Anaheim, California        | 0.00  | 0.00 | 0.16 | 0.00  | 0.00 | 0.00 | 0.00     | 1.00 | 0.63 | 0.00  | 0.00 | 0.00 | 0.00 | 0.00 | 0.04 |
| Arlington, Texas           | 0.00  | 1.00 | 0.44 | 0.00  | 0.00 | 0.00 | 0.00     | 0.00 | 0.19 | 0.00  | 0.00 | 0.00 | 0.00 | 0.00 | 0.14 |
| Atlanta, Georgia           | 0.00  | 1.00 | 0.37 | 0.00  | 1.00 | 0.54 | 0.00     | 0.00 | 0.00 | 0.00  | 0.00 | 0.00 | 0.00 | 1.00 | 0.38 |
| Aurora, Colorado           | 0.00  | 1.00 | 0.42 | 0.00  | 0.00 | 0.00 | 0.00     | 0.00 | 0.14 | 0.00  | 0.00 | 0.00 | 0.00 | 0.00 | 0.03 |
| Austin, Texas              | 0.00  | 1.00 | 0.58 | 0.00  | 0.00 | 0.00 | 0.00     | 0.00 | 0.22 | 0.00  | 0.00 | 0.00 | 0.00 | 0.00 | 0.11 |
| Bakersfield, California    | 0.00  | 1.00 | 0.27 | 0.00  | 0.00 | 0.00 | 0.00     | 1.00 | 0.49 | 0.00  | 0.00 | 0.00 | 0.00 | 0.00 | 0.24 |
| Baltimore, Maryland        | 0.00  | 0.00 | 0.22 | 0.00  | 1.00 | 0.65 | 0.00     | 0.00 | 0.00 | 0.00  | 0.00 | 0.00 | 0.00 | 1.00 | 0.31 |
| Baton Rouge, Louisiana     | 0.00  | 1.00 | 0.38 | 0.00  | 1.00 | 0.58 | 0.00     | 0.00 | 0.00 | 0.00  | 0.00 | 0.00 | 0.00 | 1.00 | 0.47 |
| Boston, Massachusetts      | 0.00  | 1.00 | 0.50 | 0.00  | 0.00 | 0.18 | 0.00     | 0.00 | 0.05 | 0.00  | 0.00 | 0.01 | 0.00 | 0.00 | 0.22 |
| Buffalo, New York          | 0.00  | 1.00 | 0.44 | 0.00  | 1.00 | 0.33 | 0.00     | 0.00 | 0.01 | 0.00  | 0.00 | 0.00 | 0.00 | 1.00 | 0.53 |
| Chandler, Arizona          | 1.00  | 1.00 | 0.89 | 0.00  | 0.00 | 0.00 | 0.00     | 0.00 | 0.07 | 0.00  | 0.00 | 0.00 | 0.00 | 0.00 | 0.05 |
| Charlotte, North Carolina  | 0.00  | 1.00 | 0.37 | 0.00  | 1.00 | 0.27 | 0.00     | 0.00 | 0.01 | 0.00  | 0.00 | 0.00 | 0.00 | 0.00 | 0.15 |
| Chesapeake, Virginia       | 0.00  | 1.00 | 0.73 | 0.00  | 0.00 | 0.20 | 0.00     | 0.00 | 0.00 | 0.00  | 0.00 | 0.00 | 0.00 | 0.00 | 0.02 |
| Chicago, Illinois          | 0.00  | 1.00 | 0.30 | 0.00  | 1.00 | 0.35 | 0.00     | 0.00 | 0.21 | 0.00  | 0.00 | 0.01 | 0.00 | 0.00 | 0.25 |
| Chula Vista, California    | 0.00  | 0.00 | 0.00 | 0.00  | 0.00 | 0.00 | 1.00     | 1.00 | 0.78 | 0.00  | 0.00 | 0.00 | 0.00 | 0.00 | 0.07 |
| Cincinnati, Ohio           | 0.00  | 1.00 | 0.52 | 0.00  | 1.00 | 0.36 | 0.00     | 0.00 | 0.00 | 0.00  | 0.00 | 0.00 | 0.00 | 1.00 | 0.41 |
| Cleveland, Ohio            | 0.00  | 0.00 | 0.22 | 0.00  | 1.00 | 0.54 | 0.00     | 0.00 | 0.02 | 0.00  | 0.00 | 0.00 | 0.00 | 1.00 | 0.68 |
| Colorado Springs, Colorado | 1.00  | 1.00 | 0.85 | 0.00  | 0.00 | 0.00 | 0.00     | 0.00 | 0.01 | 0.00  | 0.00 | 0.00 | 0.00 | 0.00 | 0.09 |
| Columbus, Ohio             | 0.00  | 1.00 | 0.59 | 0.00  | 1.00 | 0.29 | 0.00     | 0.00 | 0.00 | 0.00  | 0.00 | 0.00 | 0.00 | 1.00 | 0.31 |
| Corpus Christi, Texas      | 0.00  | 0.00 | 0.10 | 0.00  | 0.00 | 0.00 | 1.00     | 1.00 | 0.79 | 0.00  | 0.00 | 0.00 | 0.00 | 0.00 | 0.08 |
| Dallas, Texas              | 0.00  | 1.00 | 0.30 | 0.00  | 0.00 | 0.15 | 0.00     | 1.00 | 0.32 | 0.00  | 0.00 | 0.00 | 0.00 | 0.00 | 0.21 |
| Denver, Colorado           | 0.00  | 1.00 | 0.64 | 0.00  | 0.00 | 0.00 | 0.00     | 0.00 | 0.22 | 0.00  | 0.00 | 0.00 | 0.00 | 0.00 | 0.04 |

|                                 |      |      |      |      |      |      |      |      |      |      |      |      |      |      |      |
|---------------------------------|------|------|------|------|------|------|------|------|------|------|------|------|------|------|------|
| Des Moines, Iowa                | 1.00 | 1.00 | 0.84 | 0.00 | 0.00 | 0.00 | 0.00 | 0.00 | 0.00 | 0.00 | 0.00 | 0.00 | 0.00 | 0.00 | 0.11 |
| Detroit, Michigan               | 0.00 | 0.00 | 0.02 | 1.00 | 1.00 | 0.87 | 0.00 | 0.00 | 0.05 | 0.00 | 0.00 | 0.00 | 0.00 | 1.00 | 0.73 |
| Durham, North Carolina          | 0.00 | 1.00 | 0.36 | 0.00 | 0.50 | 0.26 | 0.00 | 0.00 | 0.00 | 0.00 | 0.00 | 0.00 | 0.00 | 0.00 | 0.21 |
| Fort Wayne, Indiana             | 1.00 | 1.00 | 0.78 | 0.00 | 0.00 | 0.05 | 0.00 | 0.00 | 0.00 | 0.00 | 0.00 | 0.00 | 0.00 | 1.00 | 0.27 |
| Fort Worth, Texas               | 0.00 | 1.00 | 0.31 | 0.00 | 0.00 | 0.10 | 0.00 | 1.00 | 0.28 | 0.00 | 0.00 | 0.00 | 0.00 | 0.00 | 0.18 |
| Fremont, California             | 0.00 | 0.00 | 0.00 | 0.00 | 0.00 | 0.00 | 0.00 | 0.00 | 0.00 | 0.00 | 1.00 | 0.64 | 0.00 | 0.00 | 0.00 |
| Fresno, California              | 0.00 | 0.00 | 0.22 | 0.00 | 0.00 | 0.00 | 0.00 | 1.00 | 0.53 | 0.00 | 0.00 | 0.00 | 0.00 | 1.00 | 0.44 |
| Garland, Texas                  | 0.00 | 0.00 | 0.07 | 0.00 | 0.00 | 0.00 | 0.00 | 1.00 | 0.38 | 0.00 | 0.00 | 0.00 | 0.00 | 0.00 | 0.05 |
| Glendale, Arizona               | 0.00 | 1.00 | 0.54 | 0.00 | 0.00 | 0.00 | 0.00 | 0.75 | 0.26 | 0.00 | 0.00 | 0.00 | 0.00 | 0.00 | 0.17 |
| Greensboro, North Carolina      | 0.00 | 1.00 | 0.46 | 0.00 | 1.00 | 0.28 | 0.00 | 0.00 | 0.00 | 0.00 | 0.00 | 0.00 | 0.00 | 0.00 | 0.18 |
| Houston, Texas                  | 0.00 | 0.00 | 0.23 | 0.00 | 0.00 | 0.15 | 0.00 | 1.00 | 0.38 | 0.00 | 0.00 | 0.00 | 0.00 | 0.00 | 0.24 |
| Indianapolis (balance), Indiana | 0.00 | 1.00 | 0.57 | 0.00 | 0.75 | 0.25 | 0.00 | 0.00 | 0.00 | 0.00 | 0.00 | 0.00 | 0.00 | 1.00 | 0.26 |
| Irvine, California              | 0.00 | 1.00 | 0.36 | 0.00 | 0.00 | 0.00 | 0.00 | 0.00 | 0.00 | 0.00 | 0.00 | 0.09 | 0.00 | 0.00 | 0.12 |
| Irving, Texas                   | 0.00 | 0.00 | 0.02 | 0.00 | 0.00 | 0.00 | 0.00 | 1.00 | 0.53 | 0.00 | 0.00 | 0.08 | 0.00 | 0.00 | 0.06 |
| Jacksonville, Florida           | 0.00 | 1.00 | 0.56 | 0.00 | 0.00 | 0.22 | 0.00 | 0.00 | 0.00 | 0.00 | 0.00 | 0.00 | 0.00 | 0.00 | 0.17 |
| Jersey, New Jersey              | 0.00 | 0.00 | 0.08 | 0.00 | 0.00 | 0.12 | 0.00 | 0.00 | 0.06 | 0.00 | 0.00 | 0.09 | 0.00 | 0.00 | 0.11 |
| Kansas, Missouri                | 0.00 | 1.00 | 0.52 | 0.00 | 1.00 | 0.32 | 0.00 | 0.00 | 0.04 | 0.00 | 0.00 | 0.00 | 0.00 | 0.00 | 0.21 |
| Las Vegas, Nevada               | 0.00 | 1.00 | 0.48 | 0.00 | 0.00 | 0.01 | 0.00 | 0.00 | 0.20 | 0.00 | 0.00 | 0.00 | 0.00 | 0.00 | 0.16 |
| Long Beach, California          | 0.00 | 0.25 | 0.25 | 0.00 | 0.00 | 0.01 | 0.00 | 1.00 | 0.40 | 0.00 | 0.00 | 0.00 | 0.00 | 0.00 | 0.18 |
| Los Angeles, California         | 0.00 | 1.00 | 0.26 | 0.00 | 0.00 | 0.03 | 0.00 | 1.00 | 0.48 | 0.00 | 0.00 | 0.02 | 0.00 | 0.00 | 0.18 |
| Louisville, Kentucky            | 1.00 | 1.00 | 0.89 | 0.00 | 0.00 | 0.04 | 0.00 | 0.00 | 0.01 | 0.00 | 0.00 | 0.00 | 0.00 | 0.00 | 0.03 |
| Lubbock, Texas                  | 0.00 | 1.00 | 0.62 | 0.00 | 0.00 | 0.04 | 0.00 | 0.00 | 0.16 | 0.00 | 0.00 | 0.00 | 0.00 | 1.00 | 0.33 |
| Memphis, Tennessee              | 0.00 | 0.00 | 0.22 | 0.00 | 1.00 | 0.69 | 0.00 | 0.00 | 0.01 | 0.00 | 0.00 | 0.00 | 0.00 | 1.00 | 0.49 |
| Mesa, Arizona                   | 0.00 | 1.00 | 0.72 | 0.00 | 0.00 | 0.00 | 0.00 | 0.00 | 0.13 | 0.00 | 0.00 | 0.00 | 0.00 | 0.00 | 0.10 |
| Miami, Florida                  | 0.00 | 0.00 | 0.04 | 0.00 | 0.00 | 0.15 | 0.00 | 1.00 | 0.67 | 0.00 | 0.00 | 0.00 | 0.00 | 0.00 | 0.24 |
| Milwaukee, Wisconsin            | 0.00 | 1.00 | 0.33 | 0.00 | 1.00 | 0.44 | 0.00 | 0.00 | 0.13 | 0.00 | 0.00 | 0.00 | 0.00 | 1.00 | 0.46 |
| Minneapolis, Minnesota          | 0.00 | 1.00 | 0.68 | 0.00 | 0.00 | 0.08 | 0.00 | 0.00 | 0.00 | 0.00 | 0.00 | 0.00 | 0.00 | 0.50 | 0.25 |

|                            |      |      |      |      |      |      |      |      |      |      |      |      |      |      |      |
|----------------------------|------|------|------|------|------|------|------|------|------|------|------|------|------|------|------|
| Nashville, Tennessee       | 0.00 | 1.00 | 0.54 | 0.00 | 0.00 | 0.18 | 0.00 | 0.00 | 0.00 | 0.00 | 0.00 | 0.00 | 0.00 | 0.00 | 0.13 |
| New Orleans, Louisiana     | 0.00 | 1.00 | 0.32 | 0.00 | 1.00 | 0.59 | 0.00 | 0.00 | 0.00 | 0.00 | 0.00 | 0.00 | 0.00 | 1.00 | 0.37 |
| New York, New York         | 0.00 | 1.00 | 0.32 | 0.00 | 0.00 | 0.20 | 0.00 | 0.00 | 0.19 | 0.00 | 0.00 | 0.06 | 0.00 | 0.00 | 0.17 |
| Newark, New Jersey         | 0.00 | 0.00 | 0.02 | 0.00 | 1.00 | 0.60 | 0.00 | 1.00 | 0.31 | 0.00 | 0.00 | 0.00 | 0.00 | 1.00 | 0.45 |
| Norfolk, Virginia          | 0.00 | 1.00 | 0.52 | 0.00 | 1.00 | 0.35 | 0.00 | 0.00 | 0.00 | 0.00 | 0.00 | 0.00 | 0.00 | 0.00 | 0.12 |
| North Las Vegas, Nevada    | 0.00 | 0.00 | 0.04 | 0.00 | 0.00 | 0.02 | 0.00 | 1.00 | 0.28 | 0.00 | 0.00 | 0.00 | 0.00 | 0.00 | 0.13 |
| Oakland, California        | 0.00 | 0.00 | 0.22 | 0.00 | 0.00 | 0.04 | 0.00 | 0.00 | 0.17 | 0.00 | 0.00 | 0.03 | 0.00 | 0.00 | 0.12 |
| Oklahoma, Oklahoma         | 0.00 | 1.00 | 0.57 | 0.00 | 0.00 | 0.10 | 0.00 | 0.00 | 0.13 | 0.00 | 0.00 | 0.00 | 0.00 | 0.00 | 0.23 |
| Omaha, Nebraska            | 0.00 | 1.00 | 0.72 | 0.00 | 0.00 | 0.08 | 0.00 | 0.00 | 0.09 | 0.00 | 0.00 | 0.00 | 0.00 | 0.00 | 0.16 |
| Orlando, Florida           | 0.00 | 0.50 | 0.25 | 0.00 | 0.00 | 0.22 | 0.00 | 0.00 | 0.24 | 0.00 | 0.00 | 0.00 | 0.00 | 0.00 | 0.16 |
| Philadelphia, Pennsylvania | 0.00 | 1.00 | 0.36 | 0.00 | 1.00 | 0.40 | 0.00 | 0.00 | 0.06 | 0.00 | 0.00 | 0.01 | 0.00 | 1.00 | 0.36 |
| Phoenix, Arizona           | 0.00 | 1.00 | 0.49 | 0.00 | 0.00 | 0.00 | 0.00 | 1.00 | 0.35 | 0.00 | 0.00 | 0.00 | 0.00 | 0.00 | 0.24 |
| Pittsburgh, Pennsylvania   | 0.00 | 1.00 | 0.71 | 0.00 | 0.00 | 0.21 | 0.00 | 0.00 | 0.00 | 0.00 | 0.00 | 0.00 | 0.00 | 1.00 | 0.28 |
| Plano, Texas               | 0.00 | 1.00 | 0.65 | 0.00 | 0.00 | 0.00 | 0.00 | 0.00 | 0.05 | 0.00 | 0.00 | 0.05 | 0.00 | 0.00 | 0.00 |
| Raleigh, North Carolina    | 0.00 | 1.00 | 0.72 | 0.00 | 0.00 | 0.15 | 0.00 | 0.00 | 0.00 | 0.00 | 0.00 | 0.00 | 0.00 | 0.00 | 0.15 |
| Reno, Nevada               | 0.00 | 1.00 | 0.73 | 0.00 | 0.00 | 0.00 | 0.00 | 0.00 | 0.12 | 0.00 | 0.00 | 0.00 | 0.00 | 0.00 | 0.10 |
| Richmond, Virginia         | 0.00 | 1.00 | 0.42 | 0.00 | 1.00 | 0.45 | 0.00 | 0.00 | 0.00 | 0.00 | 0.00 | 0.00 | 0.00 | 1.00 | 0.32 |
| Riverside, California      | 0.00 | 0.00 | 0.14 | 0.00 | 0.00 | 0.00 | 0.00 | 1.00 | 0.59 | 0.00 | 0.00 | 0.00 | 0.00 | 0.00 | 0.14 |
| Sacramento, California     | 0.00 | 1.00 | 0.26 | 0.00 | 0.00 | 0.00 | 0.00 | 0.00 | 0.09 | 0.00 | 0.00 | 0.00 | 0.00 | 0.00 | 0.21 |
| San Antonio, Texas         | 0.00 | 0.00 | 0.11 | 0.00 | 0.00 | 0.00 | 0.00 | 1.00 | 0.69 | 0.00 | 0.00 | 0.00 | 0.00 | 0.00 | 0.22 |
| San Bernardino, California | 0.00 | 0.00 | 0.00 | 0.00 | 0.00 | 0.00 | 1.00 | 1.00 | 0.82 | 0.00 | 0.00 | 0.00 | 0.00 | 1.00 | 0.46 |
| San Diego, California      | 0.00 | 1.00 | 0.49 | 0.00 | 0.00 | 0.00 | 0.00 | 0.00 | 0.21 | 0.00 | 0.00 | 0.04 | 0.00 | 0.00 | 0.09 |
| San Francisco, California  | 0.00 | 1.00 | 0.39 | 0.00 | 0.00 | 0.01 | 0.00 | 0.00 | 0.01 | 0.00 | 0.00 | 0.19 | 0.00 | 0.00 | 0.06 |
| San Jose, California       | 0.00 | 0.00 | 0.16 | 0.00 | 0.00 | 0.00 | 0.00 | 0.00 | 0.21 | 0.00 | 0.00 | 0.23 | 0.00 | 0.00 | 0.01 |
| Santa Ana, California      | 0.00 | 0.00 | 0.00 | 0.00 | 0.00 | 0.00 | 1.00 | 1.00 | 0.87 | 0.00 | 0.00 | 0.04 | 0.00 | 0.00 | 0.09 |
| Seattle, Washington        | 1.00 | 1.00 | 0.80 | 0.00 | 0.00 | 0.00 | 0.00 | 0.00 | 0.00 | 0.00 | 0.00 | 0.03 | 0.00 | 0.00 | 0.08 |
| St. Louis, Missouri        | 0.00 | 1.00 | 0.40 | 0.00 | 1.00 | 0.49 | 0.00 | 0.00 | 0.00 | 0.00 | 0.00 | 0.00 | 0.00 | 1.00 | 0.38 |

|                                  |      |      |      |      |      |      |      |      |      |      |      |      |      |      |      |
|----------------------------------|------|------|------|------|------|------|------|------|------|------|------|------|------|------|------|
| St. Paul, Minnesota              | 0.00 | 1.00 | 0.52 | 0.00 | 0.00 | 0.04 | 0.00 | 0.00 | 0.00 | 0.00 | 0.00 | 0.01 | 0.00 | 0.00 | 0.17 |
| St. Petersburg, Florida          | 0.75 | 1.00 | 0.75 | 0.00 | 0.00 | 0.19 | 0.00 | 0.00 | 0.00 | 0.00 | 0.00 | 0.00 | 0.00 | 0.00 | 0.07 |
| Stockton, California             | 0.00 | 0.00 | 0.07 | 0.00 | 0.00 | 0.00 | 0.00 | 1.00 | 0.28 | 0.00 | 0.00 | 0.00 | 0.00 | 1.00 | 0.32 |
| Tampa, Florida                   | 0.00 | 1.00 | 0.43 | 0.00 | 0.00 | 0.18 | 0.00 | 0.00 | 0.12 | 0.00 | 0.00 | 0.00 | 0.00 | 1.00 | 0.34 |
| Toledo, Ohio                     | 0.00 | 1.00 | 0.57 | 0.00 | 1.00 | 0.28 | 0.00 | 0.00 | 0.00 | 0.00 | 0.00 | 0.00 | 0.00 | 1.00 | 0.41 |
| Tucson, Arizona                  | 0.00 | 1.00 | 0.55 | 0.00 | 0.00 | 0.00 | 0.00 | 1.00 | 0.31 | 0.00 | 0.00 | 0.00 | 0.00 | 1.00 | 0.31 |
| Tulsa, Oklahoma                  | 0.00 | 1.00 | 0.58 | 0.00 | 0.00 | 0.09 | 0.00 | 0.00 | 0.02 | 0.00 | 0.00 | 0.00 | 0.00 | 0.00 | 0.21 |
| Virginia Beach, Virginia         | 0.00 | 1.00 | 0.73 | 0.00 | 0.00 | 0.03 | 0.00 | 0.00 | 0.00 | 0.00 | 0.00 | 0.00 | 0.00 | 0.00 | 0.01 |
| Washington, District of Columbia | 0.00 | 1.00 | 0.35 | 0.00 | 1.00 | 0.47 | 0.00 | 0.00 | 0.00 | 0.00 | 0.00 | 0.00 | 0.00 | 0.00 | 0.16 |
| Wichita, Kansas                  | 0.25 | 1.00 | 0.74 | 0.00 | 0.00 | 0.05 | 0.00 | 0.00 | 0.03 | 0.00 | 0.00 | 0.00 | 0.00 | 0.00 | 0.21 |
| Winston-Salem, North Carolina    | 0.00 | 1.00 | 0.49 | 0.00 | 1.00 | 0.26 | 0.00 | 0.00 | 0.00 | 0.00 | 0.00 | 0.00 | 0.00 | 1.00 | 0.42 |

**Table S3.** Descriptive statistics by city (cont.)

| City                       | Total trips |        |        | PM2.5 - Residential |       |       | PM2.5 - Adjacent |       |       | PM2.5 -Network (non-adjacent) |       |       |
|----------------------------|-------------|--------|--------|---------------------|-------|-------|------------------|-------|-------|-------------------------------|-------|-------|
|                            | 25th        | 75th   | Mean   | 25th                | 75th  | Mean  | 25th             | 75th  | Mean  | 25th                          | 75th  | Mean  |
| Albuquerque, New Mexico    | 31917       | 61790  | 48570  | 6.40                | 6.76  | 6.57  | 6.37             | 6.74  | 6.54  | 6.53                          | 6.62  | 6.57  |
| Anaheim, California        | 75069       | 127052 | 99305  | 11.82               | 12.15 | 12.02 | 11.81            | 12.15 | 12.01 | 11.69                         | 11.80 | 11.74 |
| Arlington, Texas           | 75458       | 139052 | 118216 | 8.74                | 8.80  | 8.77  | 8.74             | 8.80  | 8.77  | 8.73                          | 8.77  | 8.75  |
| Atlanta, Georgia           | 34165       | 85004  | 62009  | 10.73               | 10.81 | 10.76 | 10.73            | 10.81 | 10.76 | 10.65                         | 10.69 | 10.67 |
| Aurora, Colorado           | 50462       | 77832  | 68771  | 7.34                | 7.89  | 7.60  | 7.35             | 7.86  | 7.59  | 7.33                          | 7.65  | 7.48  |
| Austin, Texas              | 39952       | 88527  | 69978  | 8.16                | 8.24  | 8.19  | 8.15             | 8.24  | 8.19  | 8.15                          | 8.19  | 8.17  |
| Bakersfield, California    | 46991       | 76328  | 81622  | 12.55               | 13.02 | 12.72 | 12.52            | 12.95 | 12.67 | 12.65                         | 12.76 | 12.71 |
| Baltimore, Maryland        | 22981       | 43263  | 34729  | 8.50                | 8.61  | 8.55  | 8.50             | 8.61  | 8.55  | 8.49                          | 8.55  | 8.52  |
| Baton Rouge, Louisiana     | 30804       | 75132  | 56103  | 10.16               | 10.24 | 10.18 | 10.14            | 10.23 | 10.17 | 10.09                         | 10.13 | 10.11 |
| Boston, Massachusetts      | 27867       | 53570  | 41948  | 6.68                | 6.73  | 6.70  | 6.68             | 6.73  | 6.69  | 6.63                          | 6.66  | 6.64  |
| Buffalo, New York          | 22974       | 42920  | 33964  | 7.73                | 7.83  | 7.77  | 7.72             | 7.83  | 7.77  | 7.72                          | 7.76  | 7.72  |
| Chandler, Arizona          | 60138       | 117348 | 89910  | 8.22                | 8.44  | 8.33  | 8.21             | 8.43  | 8.32  | 8.07                          | 8.13  | 8.10  |
| Charlotte, North Carolina  | 43920       | 90589  | 71122  | 9.52                | 9.70  | 9.61  | 9.53             | 9.70  | 9.60  | 9.56                          | 9.64  | 9.60  |
| Chesapeake, Virginia       | 57519       | 128487 | 96295  | 7.12                | 7.30  | 7.22  | 7.12             | 7.29  | 7.21  | 7.19                          | 7.24  | 7.22  |
| Chicago, Illinois          | 27253       | 62211  | 47328  | 9.73                | 9.91  | 9.81  | 9.73             | 9.91  | 9.81  | 9.72                          | 9.83  | 9.78  |
| Chula Vista, California    | 58351       | 88436  | 107262 | 9.09                | 9.16  | 9.12  | 9.09             | 9.15  | 9.11  | 9.07                          | 9.09  | 9.08  |
| Cincinnati, Ohio           | 18796       | 46555  | 34271  | 9.40                | 9.56  | 9.48  | 9.41             | 9.55  | 9.48  | 9.46                          | 9.53  | 9.49  |
| Cleveland, Ohio            | 11729       | 26902  | 19998  | 9.57                | 9.71  | 9.63  | 9.57             | 9.71  | 9.63  | 9.52                          | 9.60  | 9.56  |
| Colorado Springs, Colorado | 39981       | 81166  | 66187  | 5.39                | 5.56  | 5.47  | 5.37             | 5.56  | 5.45  | 5.41                          | 5.46  | 5.44  |
| Columbus, Ohio             | 28944       | 65390  | 51253  | 8.76                | 8.85  | 8.79  | 8.76             | 8.85  | 8.79  | 8.74                          | 8.79  | 8.76  |
| Corpus Christi, Texas      | 46848       | 93782  | 74973  | 7.45                | 7.63  | 7.53  | 7.46             | 7.63  | 7.53  | 7.51                          | 7.55  | 7.53  |
| Dallas, Texas              | 48518       | 90076  | 73899  | 8.79                | 8.88  | 8.83  | 8.79             | 8.88  | 8.83  | 8.80                          | 8.86  | 8.83  |
| Denver, Colorado           | 34437       | 62122  | 52082  | 7.48                | 7.94  | 7.68  | 7.46             | 7.93  | 7.67  | 7.37                          | 7.64  | 7.50  |

|                                 |       |        |        |       |       |       |       |       |       |       |       |       |
|---------------------------------|-------|--------|--------|-------|-------|-------|-------|-------|-------|-------|-------|-------|
| Des Moines, Iowa                | 30600 | 54340  | 46436  | 7.58  | 7.62  | 7.60  | 7.58  | 7.62  | 7.60  | 7.58  | 7.59  | 7.58  |
| Detroit, Michigan               | 12591 | 29684  | 22997  | 9.59  | 9.79  | 9.69  | 9.59  | 9.78  | 9.68  | 9.57  | 9.65  | 9.61  |
| Durham, North Carolina          | 26821 | 59498  | 48013  | 9.24  | 9.37  | 9.30  | 9.24  | 9.37  | 9.29  | 9.24  | 9.27  | 9.26  |
| Fort Wayne, Indiana             | 25705 | 61219  | 42944  | 9.01  | 9.03  | 9.02  | 9.01  | 9.03  | 9.02  | 9.01  | 9.02  | 9.02  |
| Fort Worth, Texas               | 53132 | 119307 | 117243 | 8.49  | 8.65  | 8.57  | 8.49  | 8.65  | 8.57  | 8.55  | 8.66  | 8.61  |
| Fremont, California             | 40165 | 75589  | 56918  | 8.18  | 8.26  | 8.22  | 8.17  | 8.26  | 8.22  | 8.13  | 8.16  | 8.14  |
| Fresno, California              | 35383 | 63288  | 55826  | 12.61 | 13.24 | 12.86 | 12.62 | 13.22 | 12.85 | 12.59 | 12.80 | 12.68 |
| Garland, Texas                  | 75358 | 123134 | 99454  | 8.78  | 8.85  | 8.81  | 8.78  | 8.84  | 8.81  | 8.80  | 8.84  | 8.82  |
| Glendale, Arizona               | 53738 | 84223  | 71226  | 7.24  | 8.02  | 7.65  | 7.24  | 7.99  | 7.65  | 7.44  | 7.86  | 7.65  |
| Greensboro, North Carolina      | 31369 | 63734  | 49170  | 8.74  | 8.84  | 8.79  | 8.75  | 8.84  | 8.79  | 8.79  | 8.82  | 8.80  |
| Houston, Texas                  | 50885 | 94037  | 79133  | 9.88  | 10.08 | 9.92  | 9.87  | 10.08 | 9.91  | 9.81  | 9.95  | 9.84  |
| Indianapolis (balance), Indiana | 31753 | 67119  | 56861  | 9.68  | 9.82  | 9.74  | 9.67  | 9.82  | 9.74  | 9.64  | 9.71  | 9.67  |
| Irvine, California              | 64806 | 162494 | 135985 | 10.57 | 10.99 | 10.81 | 10.55 | 10.99 | 10.80 | 10.91 | 11.02 | 10.93 |
| Irving, Texas                   | 58232 | 90815  | 74155  | 8.86  | 8.89  | 8.87  | 8.86  | 8.88  | 8.87  | 8.84  | 8.85  | 8.85  |
| Jacksonville, Florida           | 52134 | 127344 | 101995 | 8.10  | 8.36  | 8.21  | 8.11  | 8.34  | 8.20  | 8.09  | 8.21  | 8.14  |
| Jersey, New Jersey              | 35865 | 70565  | 55532  | 8.88  | 8.94  | 8.91  | 8.88  | 8.94  | 8.91  | 8.73  | 8.80  | 8.77  |
| Kansas, Missouri                | 27341 | 59274  | 53898  | 7.67  | 7.91  | 7.79  | 7.66  | 7.91  | 7.79  | 7.67  | 7.79  | 7.73  |
| Las Vegas, Nevada               | 48592 | 82395  | 69982  | 5.35  | 6.95  | 6.09  | 5.31  | 6.93  | 6.08  | 6.17  | 6.81  | 6.51  |
| Long Beach, California          | 51742 | 78352  | 65854  | 10.99 | 11.67 | 11.34 | 10.98 | 11.69 | 11.34 | 11.34 | 11.50 | 11.45 |
| Los Angeles, California         | 41852 | 73090  | 58729  | 10.49 | 11.96 | 11.24 | 10.49 | 11.96 | 11.24 | 10.81 | 11.74 | 11.27 |
| Louisville, Kentucky            | 55389 | 109353 | 84679  | 9.02  | 9.15  | 9.08  | 9.01  | 9.15  | 9.07  | 9.11  | 9.14  | 9.12  |
| Lubbock, Texas                  | 46045 | 99600  | 83566  | 6.57  | 6.63  | 6.59  | 6.55  | 6.63  | 6.59  | 6.57  | 6.58  | 6.58  |
| Memphis, Tennessee              | 24118 | 69078  | 50220  | 9.02  | 9.16  | 9.08  | 9.02  | 9.16  | 9.08  | 9.00  | 9.07  | 9.04  |
| Mesa, Arizona                   | 45474 | 83777  | 70831  | 7.38  | 7.70  | 7.53  | 7.38  | 7.70  | 7.53  | 7.63  | 7.79  | 7.72  |
| Miami, Florida                  | 52933 | 100583 | 80630  | 7.49  | 7.67  | 7.58  | 7.49  | 7.68  | 7.58  | 7.52  | 7.63  | 7.58  |
| Milwaukee, Wisconsin            | 20009 | 36881  | 29937  | 8.89  | 8.97  | 8.93  | 8.89  | 8.97  | 8.93  | 8.92  | 8.95  | 8.93  |
| Minneapolis, Minnesota          | 26831 | 46671  | 38131  | 7.42  | 7.48  | 7.45  | 7.41  | 7.48  | 7.44  | 7.34  | 7.38  | 7.36  |



|                            |       |        |        |       |       |       |       |       |       |       |       |       |
|----------------------------|-------|--------|--------|-------|-------|-------|-------|-------|-------|-------|-------|-------|
| Nashville, Tennessee       | 39018 | 75416  | 61984  | 9.15  | 9.46  | 9.27  | 9.14  | 9.45  | 9.26  | 9.19  | 9.31  | 9.24  |
| New Orleans, Louisiana     | 15604 | 34454  | 28934  | 8.04  | 8.15  | 8.08  | 8.03  | 8.15  | 8.08  | 8.10  | 8.13  | 8.11  |
| New York, New York         | 37155 | 77683  | 61759  | 8.24  | 8.61  | 8.40  | 8.24  | 8.61  | 8.40  | 8.36  | 8.56  | 8.43  |
| Newark, New Jersey         | 35586 | 62289  | 51428  | 8.89  | 8.95  | 8.92  | 8.89  | 8.95  | 8.92  | 8.76  | 8.80  | 8.78  |
| Norfolk, Virginia          | 27201 | 47794  | 37967  | 7.30  | 7.37  | 7.33  | 7.30  | 7.37  | 7.33  | 7.25  | 7.28  | 7.26  |
| North Las Vegas, Nevada    | 51519 | 107483 | 86449  | 5.77  | 6.74  | 6.23  | 5.76  | 6.71  | 6.22  | 6.32  | 6.76  | 6.53  |
| Oakland, California        | 25628 | 49530  | 39273  | 8.10  | 8.32  | 8.19  | 8.10  | 8.31  | 8.19  | 8.11  | 8.14  | 8.13  |
| Oklahoma, Oklahoma         | 26476 | 85936  | 69249  | 8.28  | 8.38  | 8.32  | 8.27  | 8.38  | 8.31  | 8.28  | 8.32  | 8.30  |
| Omaha, Nebraska            | 31529 | 60811  | 49404  | 7.98  | 8.05  | 8.01  | 7.97  | 8.04  | 8.00  | 7.98  | 8.01  | 7.99  |
| Orlando, Florida           | 57061 | 127028 | 109735 | 7.74  | 7.90  | 7.82  | 7.73  | 7.90  | 7.81  | 7.73  | 7.81  | 7.77  |
| Philadelphia, Pennsylvania | 33918 | 70195  | 53836  | 9.83  | 9.94  | 9.88  | 9.83  | 9.94  | 9.88  | 9.81  | 9.90  | 9.86  |
| Phoenix, Arizona           | 45541 | 80871  | 66811  | 7.19  | 8.46  | 7.85  | 7.19  | 8.45  | 7.84  | 7.38  | 8.10  | 7.77  |
| Pittsburgh, Pennsylvania   | 15993 | 31500  | 24873  | 10.39 | 10.56 | 10.47 | 10.39 | 10.56 | 10.47 | 10.33 | 10.44 | 10.38 |
| Plano, Texas               | 87535 | 148013 | 118266 | 8.90  | 8.94  | 8.92  | 8.90  | 8.93  | 8.92  | 8.88  | 8.90  | 8.89  |
| Raleigh, North Carolina    | 54873 | 118888 | 95623  | 9.40  | 9.50  | 9.44  | 9.39  | 9.49  | 9.43  | 9.39  | 9.43  | 9.41  |
| Reno, Nevada               | 38164 | 63215  | 55696  | 6.64  | 6.74  | 6.69  | 6.63  | 6.73  | 6.68  | 6.68  | 6.70  | 6.69  |
| Richmond, Virginia         | 20257 | 49392  | 36063  | 8.19  | 8.26  | 8.22  | 8.19  | 8.26  | 8.22  | 8.17  | 8.19  | 8.18  |
| Riverside, California      | 43781 | 76056  | 64779  | 12.52 | 12.89 | 12.69 | 12.49 | 12.90 | 12.68 | 12.18 | 12.44 | 12.31 |
| Sacramento, California     | 34064 | 74794  | 56629  | 8.84  | 9.01  | 8.91  | 8.82  | 9.00  | 8.90  | 8.69  | 8.86  | 8.77  |
| San Antonio, Texas         | 57681 | 113699 | 92287  | 8.19  | 8.35  | 8.26  | 8.19  | 8.35  | 8.25  | 8.22  | 8.28  | 8.25  |
| San Bernardino, California | 48495 | 73573  | 62129  | 10.63 | 11.33 | 10.99 | 10.62 | 11.32 | 10.95 | 11.24 | 11.44 | 11.36 |
| San Diego, California      | 46412 | 82272  | 68448  | 9.01  | 9.25  | 9.11  | 9.00  | 9.25  | 9.10  | 9.02  | 9.11  | 9.06  |
| San Francisco, California  | 30743 | 61579  | 49507  | 7.57  | 7.90  | 7.73  | 7.56  | 7.90  | 7.73  | 7.69  | 7.83  | 7.76  |
| San Jose, California       | 45597 | 68729  | 59467  | 7.67  | 8.12  | 7.87  | 7.67  | 8.10  | 7.87  | 7.76  | 7.95  | 7.86  |
| Santa Ana, California      | 60320 | 87159  | 74600  | 11.17 | 11.43 | 11.29 | 11.16 | 11.40 | 11.29 | 11.20 | 11.33 | 11.26 |
| Seattle, Washington        | 36017 | 64111  | 50944  | 6.25  | 6.49  | 6.37  | 6.26  | 6.49  | 6.37  | 6.29  | 6.41  | 6.35  |
| St. Louis, Missouri        | 22449 | 43930  | 34377  | 9.23  | 9.34  | 9.28  | 9.23  | 9.34  | 9.28  | 9.20  | 9.27  | 9.23  |

|                                  |       |       |       |       |       |       |       |       |       |       |       |       |
|----------------------------------|-------|-------|-------|-------|-------|-------|-------|-------|-------|-------|-------|-------|
| St. Paul, Minnesota              | 30236 | 60016 | 44003 | 7.44  | 7.48  | 7.46  | 7.44  | 7.48  | 7.46  | 7.37  | 7.39  | 7.38  |
| St. Petersburg, Florida          | 44342 | 71718 | 60864 | 7.64  | 7.92  | 7.78  | 7.65  | 7.92  | 7.78  | 7.78  | 7.87  | 7.83  |
| Stockton, California             | 30785 | 48944 | 48373 | 10.86 | 11.15 | 11.00 | 10.83 | 11.15 | 10.97 | 10.86 | 10.92 | 10.89 |
| Tampa, Florida                   | 38192 | 82863 | 66653 | 8.40  | 8.48  | 8.41  | 8.40  | 8.48  | 8.41  | 8.31  | 8.35  | 8.31  |
| Toledo, Ohio                     | 17524 | 44387 | 31905 | 9.11  | 9.16  | 9.13  | 9.11  | 9.15  | 9.13  | 9.10  | 9.12  | 9.11  |
| Tucson, Arizona                  | 32993 | 57501 | 47102 | 6.33  | 6.66  | 6.46  | 6.31  | 6.62  | 6.45  | 6.41  | 6.51  | 6.46  |
| Tulsa, Oklahoma                  | 27775 | 62446 | 51331 | 9.47  | 9.57  | 9.52  | 9.47  | 9.56  | 9.51  | 9.49  | 9.51  | 9.50  |
| Virginia Beach, Virginia         | 52252 | 96130 | 76009 | 6.95  | 7.16  | 7.04  | 6.95  | 7.16  | 7.05  | 7.07  | 7.14  | 7.11  |
| Washington, District of Columbia | 44015 | 78524 | 62817 | 8.79  | 8.88  | 8.82  | 8.79  | 8.87  | 8.82  | 8.72  | 8.77  | 8.74  |
| Wichita, Kansas                  | 32157 | 60852 | 54151 | 7.75  | 7.80  | 7.77  | 7.74  | 7.81  | 7.76  | 7.74  | 7.75  | 7.74  |
| Winston-Salem, North Carolina    | 22280 | 59811 | 44259 | 8.49  | 8.62  | 8.55  | 8.48  | 8.62  | 8.55  | 8.54  | 8.57  | 8.55  |

**Table S4.** Regression adjusted PM<sub>2.5</sub> in the neighborhoods that residents travel to weighted by the number of trips

| <b>Group</b> | <b>Estimate</b> | <b>SE</b> | <b>95% CI</b> |              |
|--------------|-----------------|-----------|---------------|--------------|
|              |                 |           | <b>Lower</b>  | <b>Upper</b> |
| White        | 7.81            | 0.004     | 7.81          | 7.82         |
| Asian        | 8.71            | 0.013     | 8.69          | 8.74         |
| Black        | 8.71            | 0.005     | 8.70          | 8.72         |
| Hispanic     | 8.78            | 0.005     | 8.77          | 8.79         |
| Non Poor     | 8.19            | 0.003     | 8.19          | 8.20         |
| Poor         | 8.75            | 0.005     | 8.74          | 8.76         |

Estimated marginal means are from Ordinary Least Squares regressions that include total population and city-fixed effects.

**Table S5.** Regression adjusted PM<sub>2.5</sub> in residential neighborhoods (Residential), adjacent neighborhoods (Adjacent) and the non-adjacent neighborhoods that residents travel to (Network) weighted by the number of trips

| Group    | Residential |       |        |       | Adjacent |       |        |       | Network  |       |        |       |
|----------|-------------|-------|--------|-------|----------|-------|--------|-------|----------|-------|--------|-------|
|          | Estimate    | SE    | 95% CI |       | Estimate | SE    | 95% CI |       | Estimate | SE    | 95% CI |       |
|          |             |       | Lower  | Upper |          |       | Lower  | Upper |          |       | Lower  | Upper |
| White    | 7.81        | 0.006 | 7.80   | 7.82  | 7.81     | 0.007 | 7.80   | 7.82  | 7.79     | 0.005 | 7.78   | 7.80  |
| Asian    | 8.74        | 0.020 | 8.70   | 8.78  | 8.74     | 0.007 | 8.70   | 8.78  | 8.70     | 0.007 | 8.68   | 8.72  |
| Black    | 8.72        | 0.007 | 8.71   | 8.74  | 8.72     | 0.003 | 8.70   | 8.73  | 8.71     | 0.005 | 8.70   | 8.72  |
| Hispanic | 8.85        | 0.007 | 8.84   | 8.87  | 8.85     | 0.012 | 8.83   | 8.86  | 8.77     | 0.007 | 8.76   | 8.78  |
| Non Poor | 8.21        | 0.006 | 8.20   | 8.22  | 8.21     | 0.004 | 8.20   | 8.22  | 8.19     | 0.003 | 8.18   | 8.19  |
| Poor     | 8.80        | 0.020 | 8.79   | 8.81  | 8.79     | 0.004 | 8.78   | 8.81  | 8.74     | 0.004 | 8.73   | 8.75  |

Estimated marginal means are from Ordinary Least Squares regressions that include total population and city-fixed effects.

**Table S6.** Regression adjusted PM<sub>2.5</sub> in residential neighborhoods (Residential), adjacent neighborhoods (Adjacent) and the non-adjacent neighborhoods that residents travel to (Network) weighted by the number of trips by race/ethnicity and poverty status

| Group           | Residential |       |        |       | Adjacent |       |        |       | Network  |       |        |       |
|-----------------|-------------|-------|--------|-------|----------|-------|--------|-------|----------|-------|--------|-------|
|                 | Estimate    | SE    | 95% CI |       | Estimate | SE    | 95% CI |       | Estimate | SE    | 95% CI |       |
|                 |             |       | Lower  | Upper |          |       | Lower  | Upper |          |       | Lower  | Upper |
| <i>Non Poor</i> |             |       |        |       |          |       |        |       |          |       |        |       |
| White           | 7.77        | 0.005 | 7.76   | 7.78  | 7.77     | 0.005 | 7.76   | 7.78  | 7.79     | 0.003 | 7.78   | 7.80  |
| Asian           | 8.70        | 0.021 | 8.66   | 8.74  | 8.69     | 0.021 | 8.65   | 8.73  | 8.67     | 0.012 | 8.65   | 8.70  |
| Black           | 8.71        | 0.009 | 8.69   | 8.73  | 8.70     | 0.009 | 8.69   | 8.72  | 8.70     | 0.005 | 8.69   | 8.71  |
| Hispanic        | 8.79        | 0.008 | 8.77   | 8.80  | 8.78     | 0.008 | 8.76   | 8.80  | 8.73     | 0.005 | 8.72   | 8.74  |
| <i>Poor</i>     |             |       |        |       |          |       |        |       |          |       |        |       |
| White           | 8.26        | 0.018 | 8.22   | 8.29  | 8.25     | 0.018 | 8.22   | 8.29  | 8.20     | 0.011 | 8.22   | 8.19  |
| Asian           | 8.85        | 0.060 | 8.73   | 8.97  | 8.84     | 0.060 | 8.72   | 8.96  | 8.76     | 0.036 | 8.69   | 8.83  |
| Black           | 8.74        | 0.010 | 8.72   | 8.76  | 8.73     | 0.010 | 8.71   | 8.75  | 8.72     | 0.006 | 8.71   | 8.73  |
| Hispanic        | 8.94        | 0.011 | 8.92   | 8.97  | 8.94     | 0.011 | 8.92   | 8.96  | 8.83     | 0.006 | 8.81   | 8.84  |

Estimated marginal means are from Ordinary Least Squares regressions that include total population and city-fixed effects.

**Table S7.** Within-MSA travel patterns by neighborhood racial/ethnic and poverty type, Proportion of trips

| Group           | Residential |       |        |       | Adjacent |       |        |       | Network  |       |        |       |
|-----------------|-------------|-------|--------|-------|----------|-------|--------|-------|----------|-------|--------|-------|
|                 | Estimate    | SE    | 95% CI |       | Estimate | SE    | 95% CI |       | Estimate | SE    | 95% CI |       |
|                 |             |       | Lower  | Upper |          |       | Lower  | Upper |          |       | Lower  | Upper |
| <i>Non Poor</i> |             |       |        |       |          |       |        |       |          |       |        |       |
| White           | 0.08        | 0.004 | 0.07   | 0.09  | 0.19     | 0.007 | 0.18   | 0.20  | 0.73     | 0.007 | 0.72   | 0.74  |
| Asian           | 0.06        | 0.016 | 0.03   | 0.10  | 0.17     | 0.027 | 0.11   | 0.22  | 0.77     | 0.029 | 0.71   | 0.83  |
| Black           | 0.06        | 0.007 | 0.05   | 0.07  | 0.14     | 0.011 | 0.12   | 0.16  | 0.80     | 0.012 | 0.78   | 0.83  |
| Hispanic        | 0.07        | 0.007 | 0.06   | 0.09  | 0.17     | 0.011 | 0.15   | 0.19  | 0.76     | 0.012 | 0.73   | 0.78  |
| <i>Poor</i>     |             |       |        |       |          |       |        |       |          |       |        |       |
| White           | 0.13        | 0.020 | 0.09   | 0.17  | 0.20     | 0.025 | 0.16   | 0.25  | 0.66     | 0.028 | 0.61   | 0.72  |
| Asian           | 0.12        | 0.064 | -0.01  | 0.24  | 0.23     | 0.090 | 0.05   | 0.40  | 0.66     | 0.097 | 0.47   | 0.85  |
| Black           | 0.08        | 0.008 | 0.06   | 0.09  | 0.14     | 0.011 | 0.12   | 0.17  | 0.78     | 0.013 | 0.75   | 0.81  |
| Hispanic        | 0.09        | 0.010 | 0.07   | 0.11  | 0.17     | 0.014 | 0.14   | 0.20  | 0.74     | 0.016 | 0.71   | 0.77  |

Estimated marginal proportions are from logistic regressions that include total population and city-fixed effects.

**Table S8.** Within-MSA travel patterns by neighborhood racial/ethnic and poverty type, Average distance travelled

| <b>Group</b>    | <b>Estimate</b> | <b>SE</b> | <b>95% CI</b> |              |
|-----------------|-----------------|-----------|---------------|--------------|
|                 |                 |           | <b>Lower</b>  | <b>Upper</b> |
| <i>Non Poor</i> |                 |           |               |              |
| White           | -1.08           | 0.001     | -1.08         | -1.08        |
| Asian           | -1.07           | 0.004     | -1.07         | -1.06        |
| Black           | -1.06           | 0.002     | -1.06         | -1.05        |
| Hispanic        | -1.08           | 0.002     | -1.08         | -1.08        |
| <i>Poor</i>     |                 |           |               |              |
| White           | -1.11           | 0.004     | -1.12         | -1.10        |
| Asian           | -1.10           | 0.012     | -1.13         | -1.08        |
| Black           | -1.08           | 0.002     | -1.09         | -1.08        |
| Hispanic        | -1.11           | 0.002     | -1.11         | -1.11        |

Estimated marginal means are from Ordinary Least Squares regressions that include total population and city-fixed effects. Distance is within-MSA standardized.
